# Supplementary material
Source: publisher figshare collection journal article supplement (https://frontiersin.figshare.com/ndownloader/files/19751705)
Supplement: Supplementary file [file 19751705]

**Enhanced anti-melanoma efficacy of a Pim-3-targeting bifunctional shRNA via ssRNA-mediated activation of pDCs**

Jing Liu, Yuan Hu, Qie Guo, Xin Yu, Liwei Shao, Cai Zhang\*

Institute of Immunopharmaceutical Sciences, School of Pharmaceutical Sciences,  
Shandong University, Jinan, Shandong 250012, China

**Supplementary Table 1. Antibodies used for flow cytometry**

| <b>Fluorophore</b> | <b>Antibody</b>         | <b>Clone name</b> | <b>Company</b> |
|--------------------|-------------------------|-------------------|----------------|
| APC                | anti-mouse CD69         | H1.2F3            | eBioscience    |
| Percp-cy5.5        | anti-mouse CD8 $\alpha$ | H35-17.2          | eBioscience    |
| PE                 | anti-mouse CD4          | RM4-5             | eBioscience    |
| Percp-cy5.5        | anti-mouse CD4          | RM4-5             | eBioscience    |
| PE-Cy7             | anti-mouse CD3e         | 145-2C11          | eBioscience    |
| APC-cy7            | anti-mouse NK1.1        | PK136             | eBioscience    |
| FITC               | anti-mouse CD317        | 927               | BioLegend      |
| Percp-cy5.5        | anti-mouse B220         | RA3-6B2           | eBioscience    |
| BV510              | anti-mouse CD11c        | N418              | BioLegend      |
| PE                 | anti-mouse CD25         | PC61              | eBioscience    |
| APC                | anti-mouse Foxp3        | FJK-16s           | eBioscience    |
| FITC               | anti-mouse CD11b        | ICRF44            | BioLegend      |
| PE                 | anti-mouse ly6G         | 1A8               | BioLegend      |
| APC                | anti-mouse ly6C         | HK1.4             | BioLegend      |
| PE                 | anti-mouse CD80         | 16-10A1           | BioLegend      |
| APC                | anti-mouse CD40         | 3/23              | BioLegend      |
| PE-CF594           | anti-mouse CD45         | 30-F11            | BioLegend      |
| BV421              | Fixable Viability Dye   |                   | BioLegend      |
| BV510              | Fixable Viability Dye   |                   | BioLegend      |

## Supplementary Figures

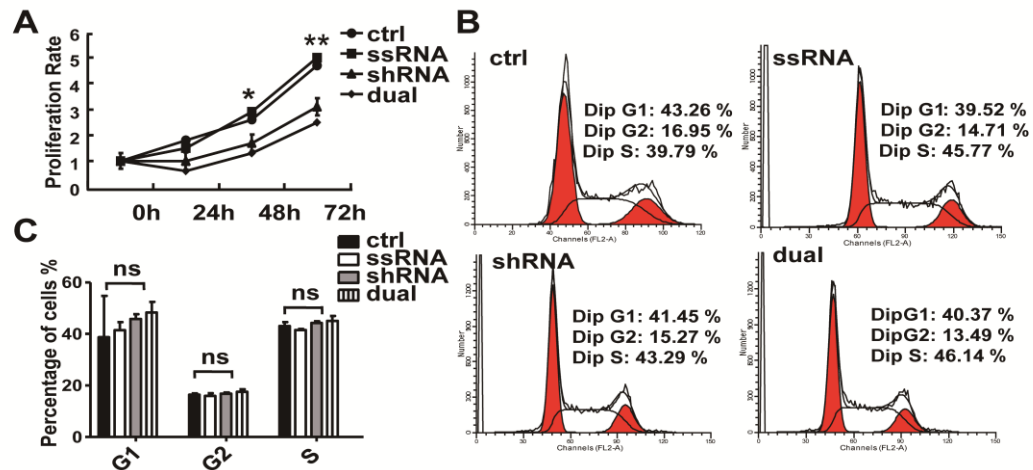

**Figure S1. The proliferation and cell cycle status of B16F10 cells were detected after transfection with different vectors. (A)** Cell proliferation of B16F10 cells after transfection for 24 hours with the indicated vectors. **(B)** Flow cytometric analysis of B16F10 cell cycle stage after transfection for 24 hours. **(C)** Statistical analysis of B16F10 cell cycle stages. Data are representative of three independent experiments.

**\*\*** $P < 0.01$  or **\*** $P < 0.05$  versus control group.

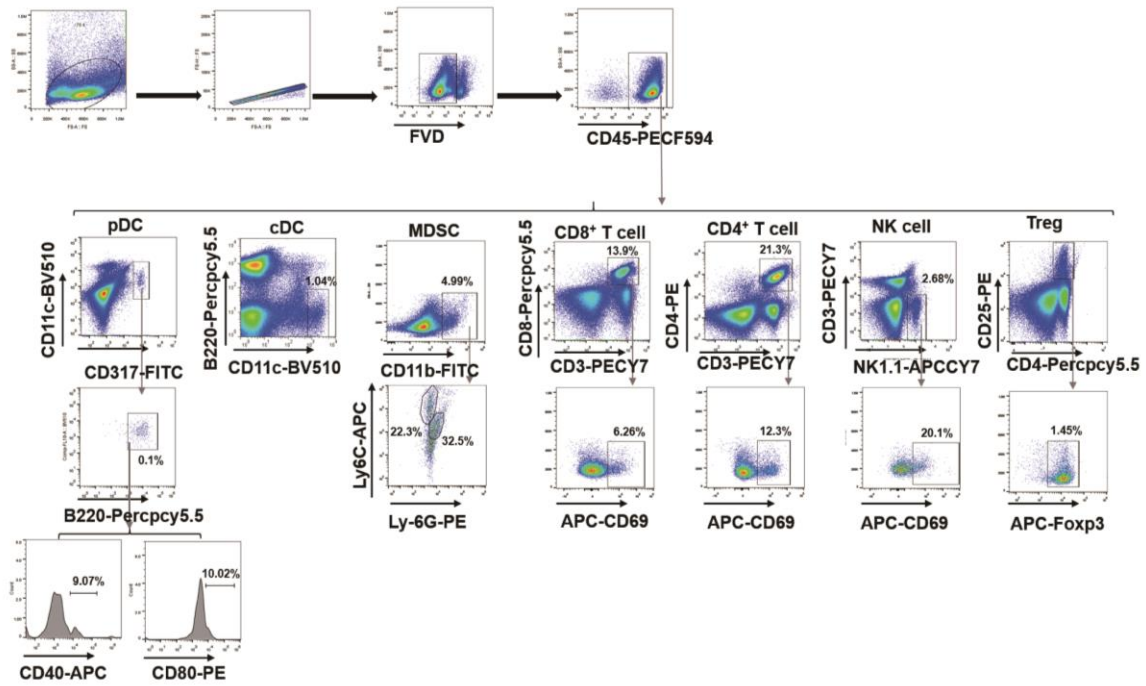

**Figure S2. FACS gating strategy.** FSA x SSA gating to obtain cells based on size and granularity. Single cells were identified by plotting forward scatter-area against forward scatter-height and were then separated from debris by a forward versus side scatter. Then live/dead FVD marker was used to identify live cells. Leucocytes were gated on CD45-positive events. Staining with lineage-specific antibodies against CD4<sup>+</sup>T cells (CD3<sup>+</sup>CD4<sup>+</sup>, activation markers: CD69), CD8<sup>+</sup>T cells (CD3<sup>+</sup>CD8<sup>+</sup>, activation markers: CD69), NK cells (NK1.1<sup>+</sup>CD3<sup>-</sup>, activation markers: CD69), pDCs (CD317<sup>+</sup>CD11c<sup>int</sup>B220<sup>hi</sup>, activation markers: CD80, CD40), cDCs (CD11c<sup>hi</sup>B220<sup>-</sup>), MDSCs (M-MDSCs: CD11b<sup>+</sup>Ly6C<sup>+</sup>Ly6G<sup>neg</sup>, PMN-MDSCs: CD11b<sup>+</sup>Ly6C<sup>neg</sup>Ly6G<sup>+</sup>) and Treg cells (CD4<sup>+</sup>CD25<sup>+</sup>Foxp3<sup>+</sup>) to allow identify of these cells and detect its function. The proportion of pDCs and Treg displayed is calculated as a percentage of CD45 positive cells.

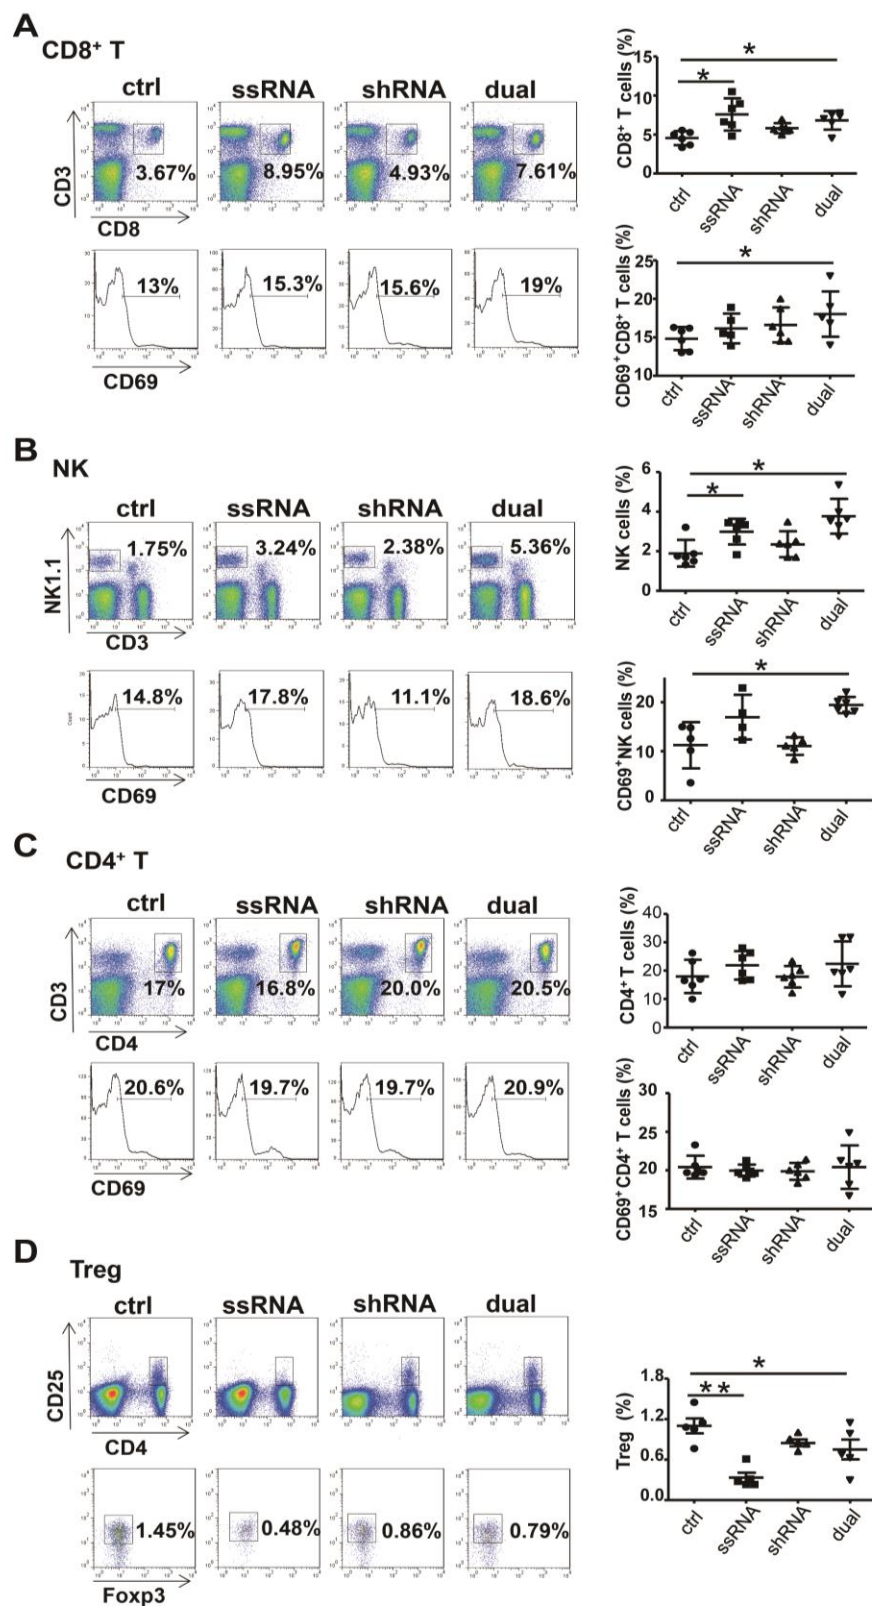

**Figure S3. Treatment with bi-functional vector enhances the activation of NK and CD8<sup>+</sup> T cells in spleen.** The percentages and activation of spleen in

tumor-bearing C57BL/6 mice were determined via flow cytometric analysis. **(A)** CD8<sup>+</sup> T cells. **(B)** NK cells. **(C)** CD4<sup>+</sup> T cells. **(D)** Treg cells. Data are representative of three independent experiments. \* $P < 0.05$ , \*\* $P < 0.01$ , \*\*\* $P < 0.001$  versus control group.

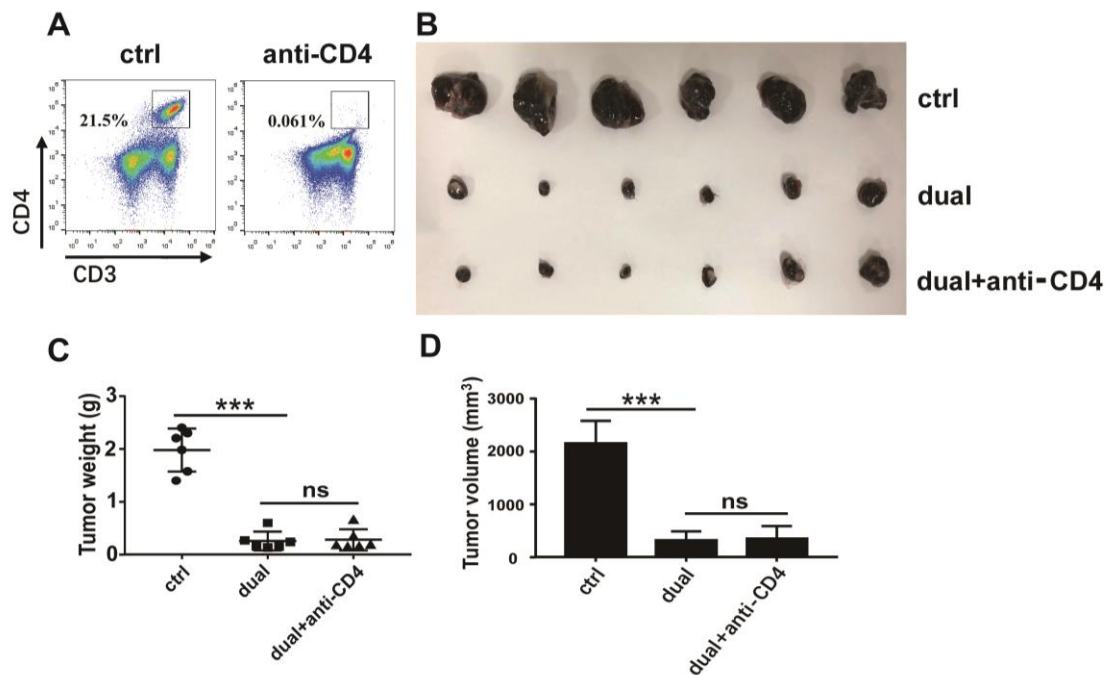

**Figure S4. Depletion of CD4<sup>+</sup> T cells for the treatment effect of the dual-function vector on B16F10 melanoma. (A)** The effect of CD4<sup>+</sup> T cell depletion by injection of GK1.5 antibody. **(B)** Tumor sizes after treatment. **(C)** Analysis of tumor weights. **(D)** Analysis of tumor volumes. Data are representative of three independent experiments. \*\*\* $P < 0.001$  versus control group.

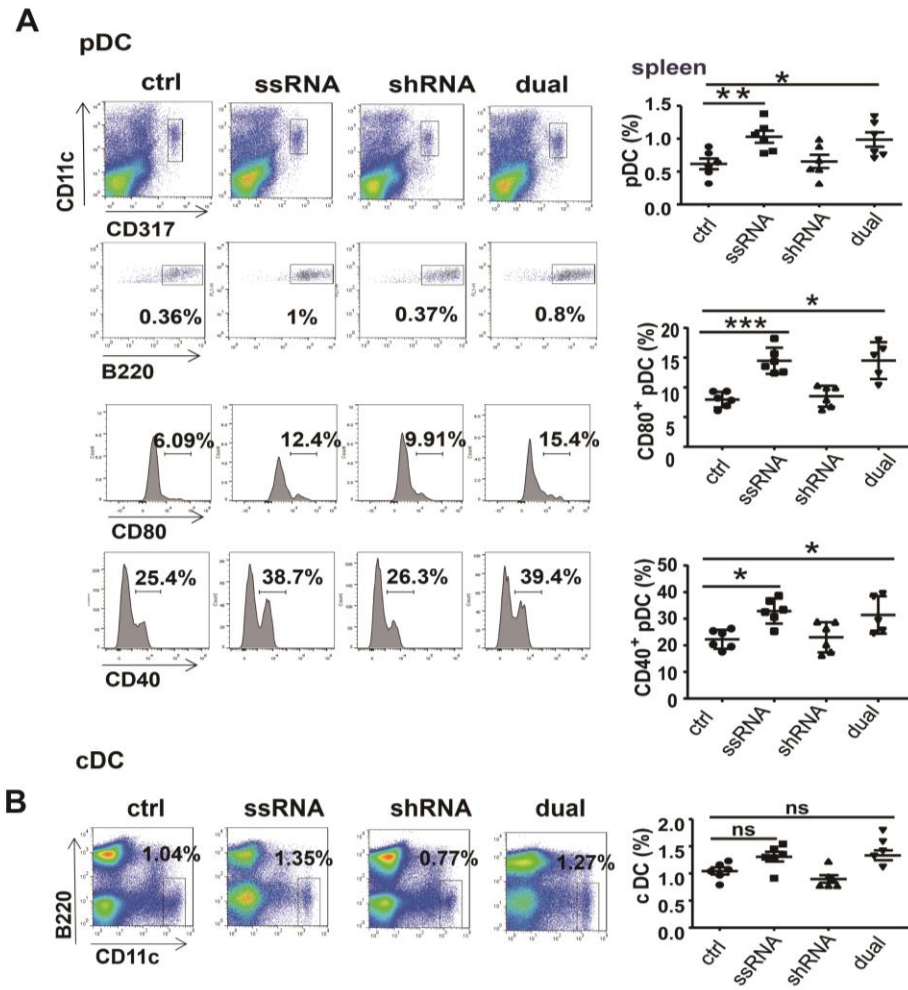

**Figure S5. The percentages and activation of pDCs were increased in spleen. (A)**

The percentages and activation of pDCs in spleen of C57BL/6 mice were determined via flow cytometric analysis. **(B)** The percentages of cDCs in spleen of C57BL/6 mice were determined via flow cytometric analysis. Data are representative of three independent experiments. \* $P < 0.05$ , \*\* $P < 0.01$ , \*\*\* $P < 0.001$  versus control group.

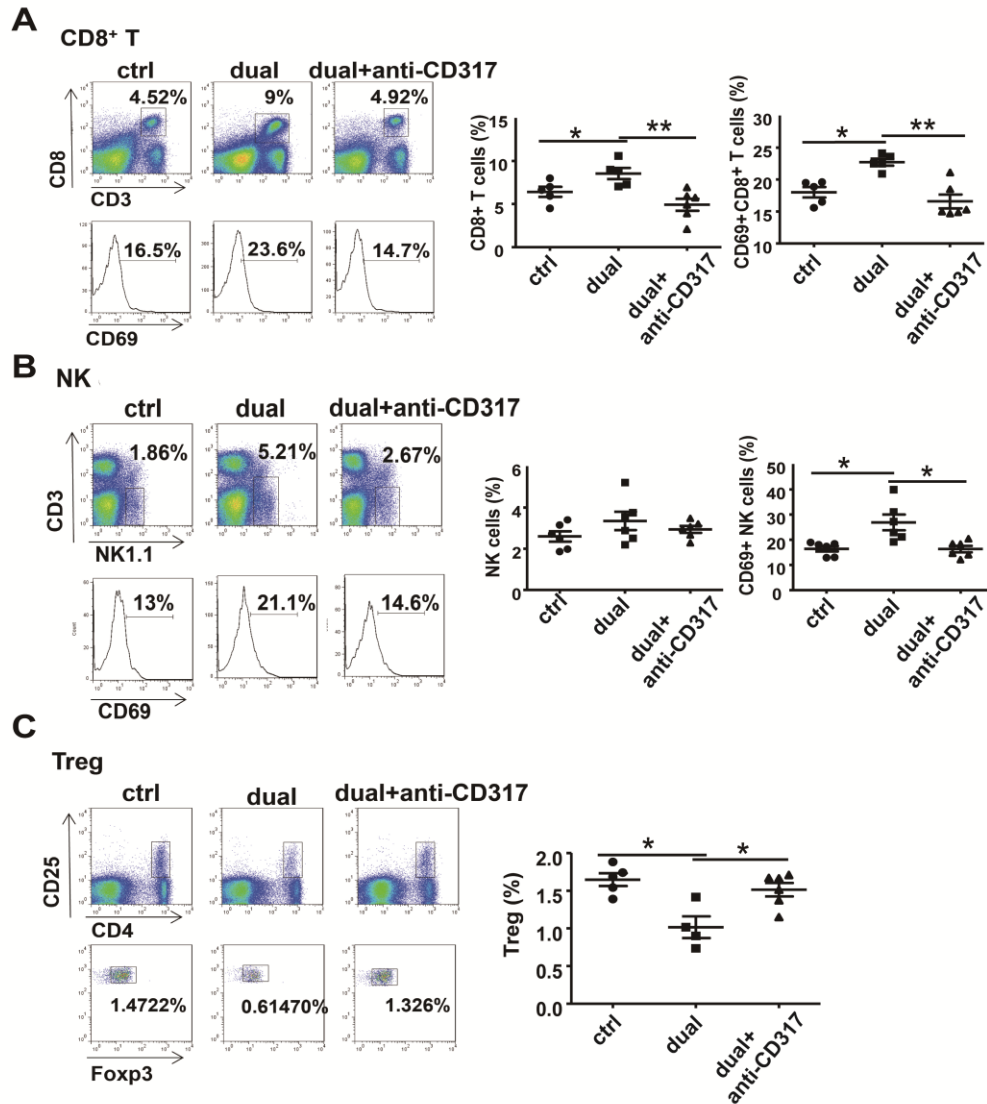

**Figure S6. pDCs are necessary for the activation of NK cells and CD8<sup>+</sup> T cells in spleen.** The percentages and activation of CD8<sup>+</sup> T cells (A), NK cells (B) and Treg cells (C) in spleen after pDC depletion were determined by flow cytometric analysis. Data are representative of three independent experiments. \*\* $P < 0.01$  or \* $P < 0.05$  versus control group.
